# Supplementary material
Source: Springer Nature journal article supplement (https://www.springermedizin.de/resource/supplementary/12974_2011_449_MOESM1_ESM.pdf/9601328)

**A**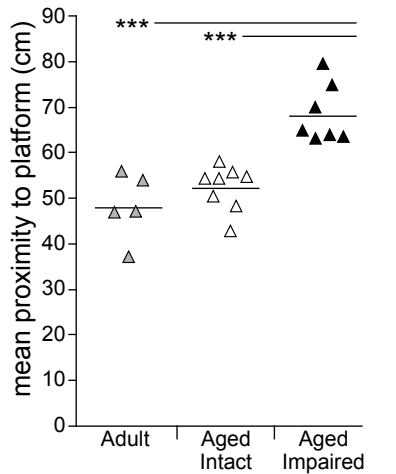

Synaptosome Preparation

**B**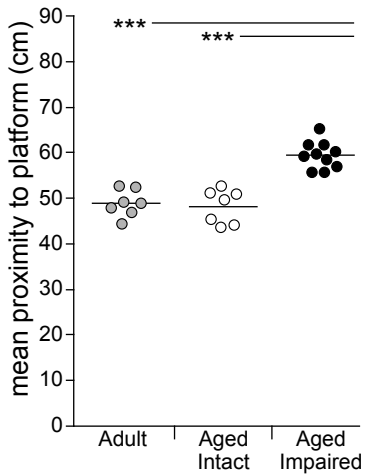

Subregion Dissection

**C**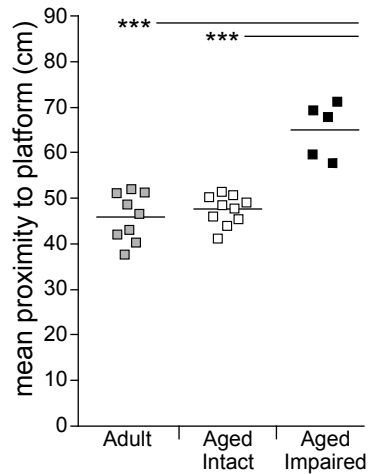

Immunohistochemistry

Supplement: MOESM1 [file 9601328]
